# Supplementary material
Source: Springer Nature journal article supplement (https://www.springermedizin.de/resource/supplementary/12984_2009_228_MOESM5_ESM.pdf/9605572)
Supplement: MOESM5 [file 9605572]

Location

Effort

Fatigue

(A) *mAV*, *waveLen*, *AR*, *ceps*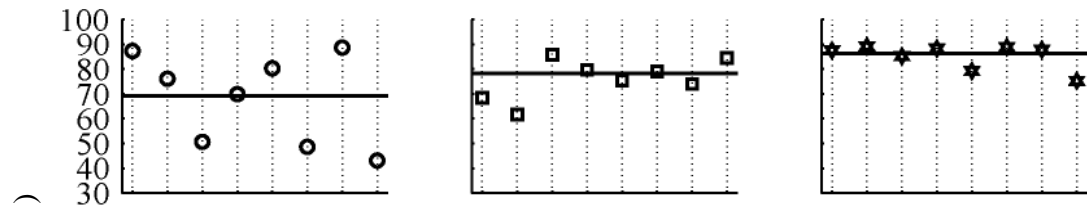(B) *waveLen*, *logDetect*, *AR*, *ceps*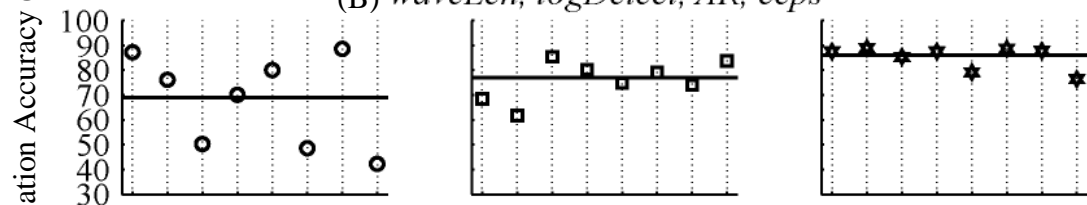(C) *waveLen*, *wAmp*, *AR*, *ceps*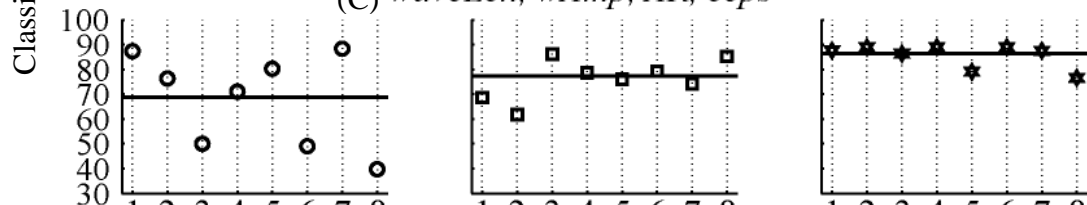

Subject
